# Supplementary material
Source: publisher figshare collection journal article supplement (https://sage.figshare.com/ndownloader/files/20105603)
Supplement: Supplementary file 1 [file 20105603]

ATLAS TI CODES

**KNOWLEDGE AREAS**

1. **History, Theory and Law**
   1. History of planning
   2. Planning law
   3. Theory of planning
   4. Patterns of human settlement
2. **Plan Making and Implementation**
   1. Visioning and goal setting
   2. Quantitative and qualitative research methods
   3. Collecting, organizing, analyzing, and reporting data and information
   4. Demographics and economics
   5. Natural and built environment
   6. Land use and development regulations
   7. Application of legal principles
   8. Environmental analysis
   9. Growth management techniques
   10. Budgets and financing options
   11. GIS/spatial analysis and information systems
   12. Policy analysis and decision making
   13. Development plan and project review
   14. Program evaluation
   15. Communications techniques
   16. Intergovernmental relationships
   17. Stakeholder relationships
   18. Project and program management
3. **Functional Areas of Practice**
   1. Community development
   2. Comprehensive or long range planning
   3. Development regulation or administration
   4. Economic development and revitalization
   5. Economic analysis and forecasting
   6. Educational, institutional, or military facilities planning
   7. Energy policy
   8. Food system planning
   9. Growth management
   10. Hazard mitigation and disaster planning
   11. Historic preservation
   12. Housing
   13. Infrastructure
   14. Labor force or employment
   15. Land use
   16. Natural resources and the environment
   17. Parks, open space and recreation
   18. Planning law
   19. Policy planning
   20. Public services
   21. Social and health services
   22. Transportation
   23. Urban design
4. **Spatial Areas of Practice**
   1. Planning at national level
   2. Planning for multi-state or bi-state regions
   3. Planning for state
   4. Planning for sub-state region
   5. Planning at county level
   6. Planning for urban areas
   7. Planning for suburban areas
   8. Planning for small town
   9. Corridors
   10. Neighborhoods
   11. Waterfronts
   12. Historic districts or areas
   13. Downtowns
5. **Public Participation and Social Justice**
   1. Public involvement planning
   2. Public participation techniques
   3. Identifying, engaging, and serving underserved groups
   4. Social justice issues, literature, and practice
   5. Working with diverse communities
   6. Coalition building
6. **Planner Skills**
   1. Knowledge of urban spatial structure or physical design and the way in which cities work
   2. Ability to analyze demographic information to discern trends in population, employment, and health.
   3. Knowledge of plan-making and project evaluation.
   4. Mastery of techniques for involving a wide range of people in making decisions.
   5. Understanding of local, state, and federal government programs and processes
   6. Understanding of the social and environmental impact of planning decisions on communities.
   7. Ability to work with the public and articulate planning issues to a wide variety of audiences.
   8. Ability to function as a mediator or facilitator when community interests conflict.
   9. Understanding of the legal foundation for land use regulation.
   10. Understanding of the interaction among the economy, transportation, health and human services, and land-use regulation.
   11. Ability to solve problems using a balance of technical competence, creativity, and hardheaded pragmatism.
   12. Ability to envision alternatives to the physical and social environments in which we live.
   13. Mastery of geographic information systems and office software.
7. **Learning strategies**
   1. Lecturing
   2. Student presentations
   3. Classroom discussion
   4. Case analysis
   5. Workshops
   6. Other (specify)
8. **Evaluation and grading strategies**
   1. Exams
   2. Papers/essays
   3. Project/plan
   4. Homework
   5. Classroom participation
   6. Other (specify)
9. **Bibliography used (language)**
   1. Almost entirely in native language
   2. About half native language half English
   3. The majority in English
   4. Uses material other than English and native language
10. **Bibliography (authors)**
    1. Mostly classical authors or works
    2. Half classical authors and half native authors
    3. Almost entirely native authors
11. **Reading material type**
    1. Mostly books and book chapters
    2. Mostly journal articles
    3. A mixed of books and journal articles
12. **Institution**
    1. El Colegio de la Frontera Norte
    2. Universidad Autónoma de Baja California
    3. El Colegio de México
    4. El Colegio Mexiquense
    5. Instituto de Investigaciones “Dr. José María Luis Mora”
    6. Instituto Politécnico Nacional
    7. Instituto Tecnológico de Oaxaca
    8. Universidad Autónoma de Ciudad Juárez
    9. Universidad Autónoma de Nayarit
    10. Universidad Autónoma de Nuevo León
    11. Universidad Autónoma del Estado de México
    12. Universidad Autónoma Metropolitana
    13. Universidad Autónoma de Quintana Roo
    14. Universidad Nacional Autónoma de México (UNAM)
    15. Universidad de Guadalajara
    16. Universidad Autónoma de Chiapas
13. **Program description**
    1. Planning (gestión)
    2. Development (regional o local)
    3. Urbanism & design
    4. Territorial planning
    5. Other (specify)
14. **Area of knowledge**
    1. Theory
    2. Methods
    3. Specialization
